# Supplementary material for: Sulfated Glycans Inhibit the Interaction of MERS-CoV Receptor Binding Domain with Heparin
Source: MDPI journal article supplement (doi:10.3390/v16020237), 2024-02-02
Supplement: s1 [file s1]

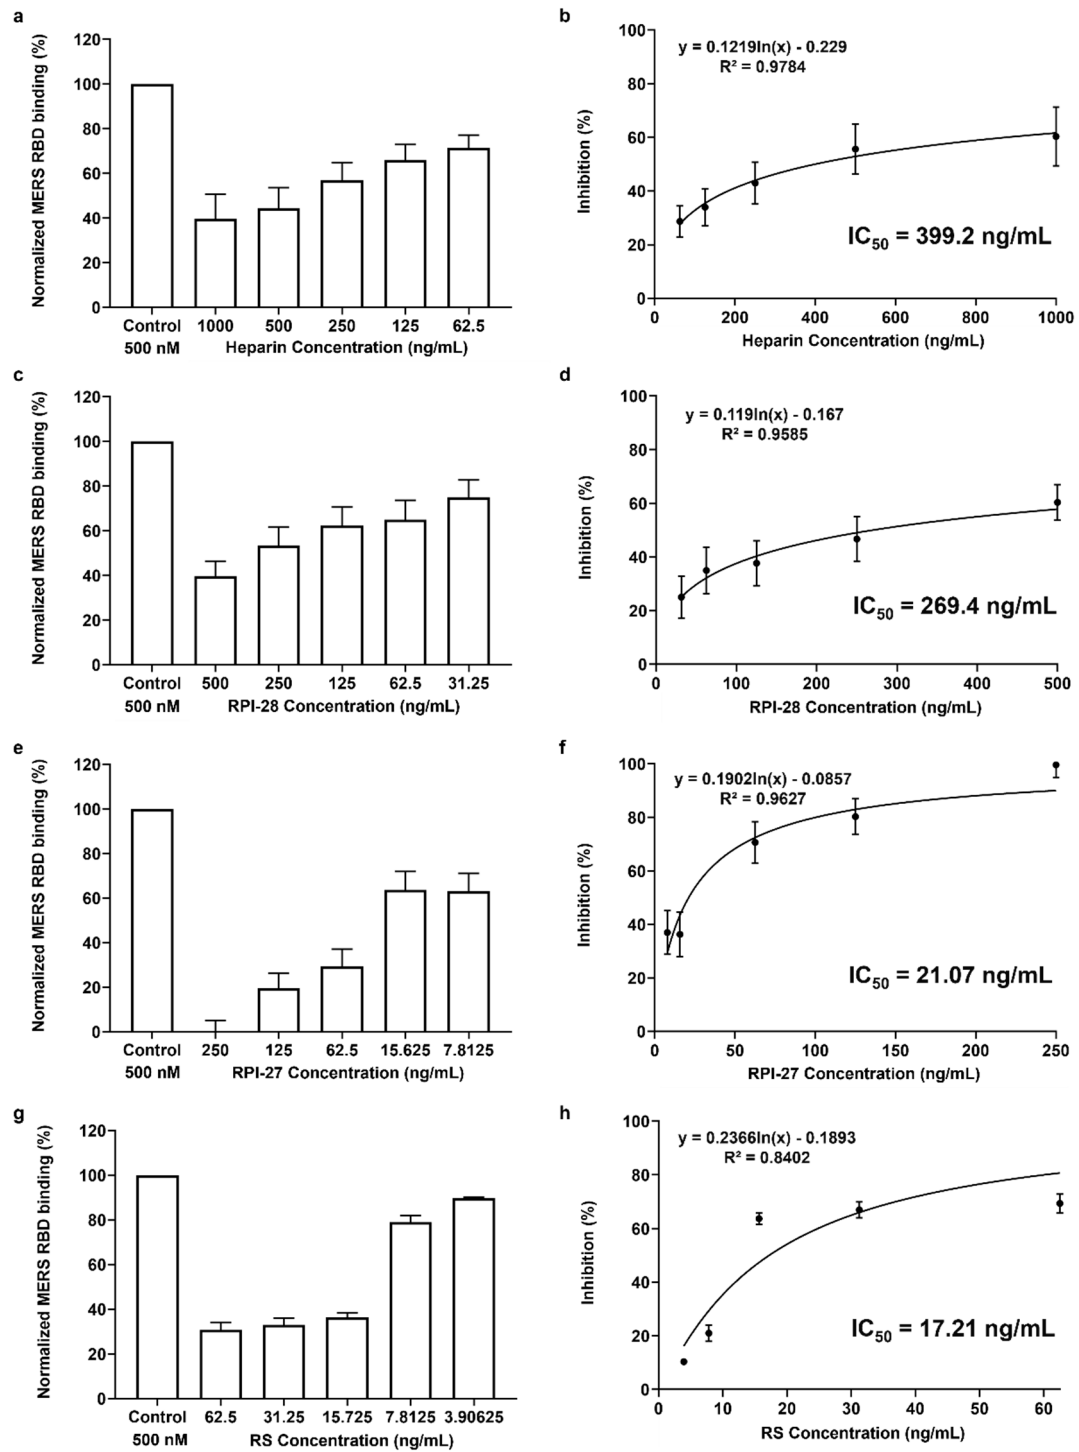

**Figure S1.**  $IC_{50}$  measurement of the inhibition of MERS RBD binding to heparin using solution competition SPR by seaweed-sourced sulfated glycans. (a, b) = heparin; (c, d) = RPI-28; (e, f) = RPI-27; (g, h) = RS.  $IC_{50}$  values were calculated using dose-response-inhibition equations in GraphPad Prism 9. Data showed as mean  $\pm$  SD.
